# Supplementary material for: Genes Associated with SLE Are Targets of Recent Positive Selection
Source: Hindawi journal article supplement (doi:10.1155/2014/203435), 2014-01-01
Supplement: f1 [file 203435.f1.pdf]

## Supplementary Material

**Supplemental Table 1.** SLE-associated SNPs queried for evidence for selection in the HapMap samples.

| Region       | SNPs       |
|--------------|------------|
| PTPN22       | rs2476601  |
| TNFSF4       | rs2205960  |
| TNFSF4       | rs2205960  |
| TNFSF4       | rs3850641  |
| NMNAT2       | rs2022013  |
| NCF2         | rs10911363 |
| APOBEC4      | rs10911390 |
| CFH          | rs6677604  |
| CFHR1,CFHR4  | rs16840639 |
| TET3,DGUOK   | rs6705628  |
| TET3,DGUOK   | rs4852324  |
| TET3,DGUOK   | rs6705628  |
| IFIH1        | rs1990760  |
| TREX1        | rs72556554 |
| TNIP1        | rs7708392  |
| TNIP1        | rs10036748 |
| ITPR3        | rs3748079  |
| UHRF1BP1     | rs11755393 |
| UHRF1BP1     | rs3734266  |
| XKR6         | rs6985109  |
| BLK          | rs13277113 |
| BLK          | rs2736340  |
| BLK          | rs2254546  |
| BLK          | rs13277113 |
| ARMC3        | rs11013210 |
| LRRC18,WDFY4 | rs1913517  |
| LRRC18,WDFY4 | rs877819   |
| ITGAM        | rs1143679  |
| ITGAM        | rs9888739  |
| ITGAM        | rs4548893  |
| ITGAM        | rs9937837  |
| CD226        | rs763361   |
| CD226        | rs727088   |

**Supplemental Table 2.** SLE-associated SNPs queried for evidence for selection in the HGDP samples.

| Gene region | SNPs       |
|-------------|------------|
| PTPN22      | rs2476601  |
| TNFSF4      | rs2205960  |
| TNFSF4      | rs2205960  |
| TNFSF4      | rs3850641  |
| CRP         | rs3093061  |
| IL10        | rs3024505  |
| TET3,DGUOK  | rs6705628  |
| TET3,DGUOK  | rs4852324  |
| TNIP1       | rs7708392  |
| TNIP1       | rs10036748 |
| PTTG1       | rs2431099  |
| UHRF1BP1    | rs11755393 |
| UHRF1BP1    | rs3734266  |
| IKZF1       | rs4917014  |
| IKZF1       | rs10276619 |
| BLK         | rs13277113 |
| BLK         | rs2736340  |
| BLK         | rs2254546  |
| BLK         | rs13277113 |
| ARMC3       | rs11013210 |
| SLC15A4     | rs10847697 |
| SLC15A4     | rs1385374  |
| CLEC16A     | rs12599402 |
| CLEC16A     | rs12708716 |
| ITGAM       | rs1143679  |
| ITGAM       | rs9888739  |
| ITGAM       | rs4548893  |
| ITGAM       | rs9937837  |
| IRF8        | rs12444486 |
| IRF8        | rs11644034 |
| SCUBE1      | rs2071725  |
